# Supplementary material for: Electromagnetic wave absorption and dielectric-modulation of metallic perovskite lanthanum nickel oxide
Source: Royal Society of Chemistry journal article supplement (doi:10.1039/c5ra00139k), 2015-01-01
Supplement: c5ra00139k1.pdf [file c5ra00139k1.pdf]

Supplementary Information

## Electromagnetic wave absorption and dielectric-modulation of metallic perovskite lanthanum nickel oxide

J.J. Jiang,<sup>a</sup> D. Li,<sup>a,\*</sup> S.J. Li,<sup>a</sup> Z.H. Wang,<sup>a</sup> Y. Wang,<sup>b</sup> J. He,<sup>b</sup> W. Liu<sup>a</sup> and Z.D Zhang<sup>a</sup>,

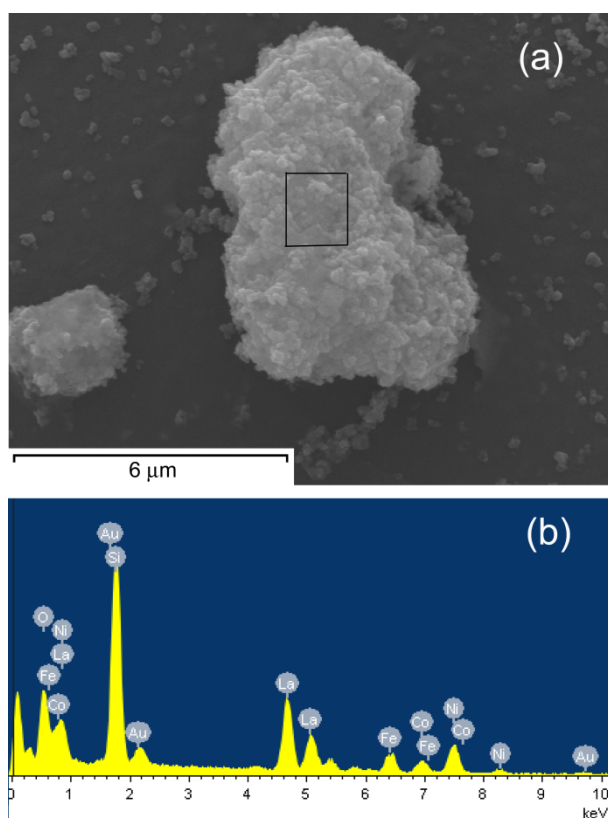

Figure S1. (a) SEM image of a LNO-FeCo/C composite powder, and (b) EDX analysis of the LNO-FeCo/C composite powder in the selected area. The peaks of Si come from the substrate for the sample support and Au for the electrons transport.

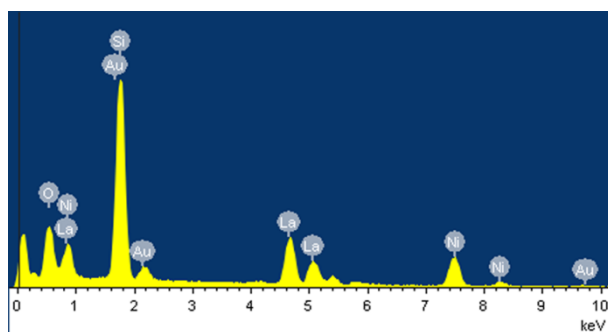

Figure S2. EDX analysis of the  $\text{LaNiO}_3$  powder. The peaks of Si come from the substrate for the sample support and Au for the electrons transport.

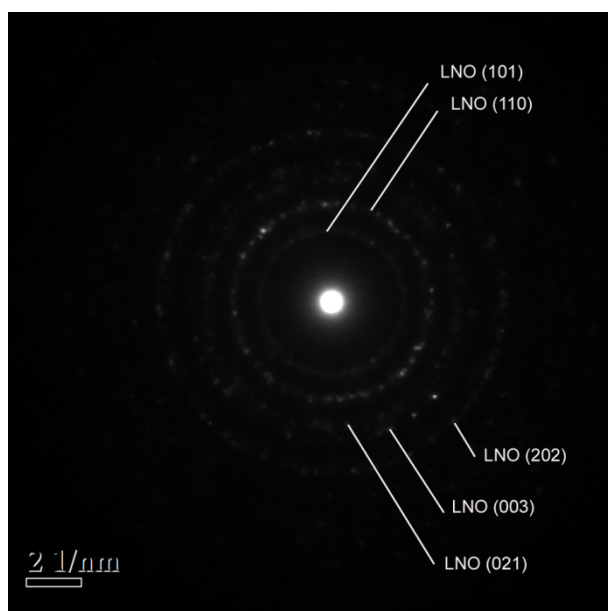

Figure S3. The SAED pattern of the LNO powder.
